# Supplementary material for: Venomics Reveals a Non-Compartmentalised Venom Gland in the Early Diverged Vermivorous Conus distans
Source: MDPI journal article supplement (doi:10.3390/toxins14030226), 2022-03-19
Supplement: s1 [file s1]

# Supplementary Materials: Venomics Reveals a Non-Compartmentalised Venom Gland in the Early Diverged Vermivorous *Conus distans*

Jutty RaJan Prashanth, Sebastien Dutertre, Subash Kumar Rai and Richard J. Lewis

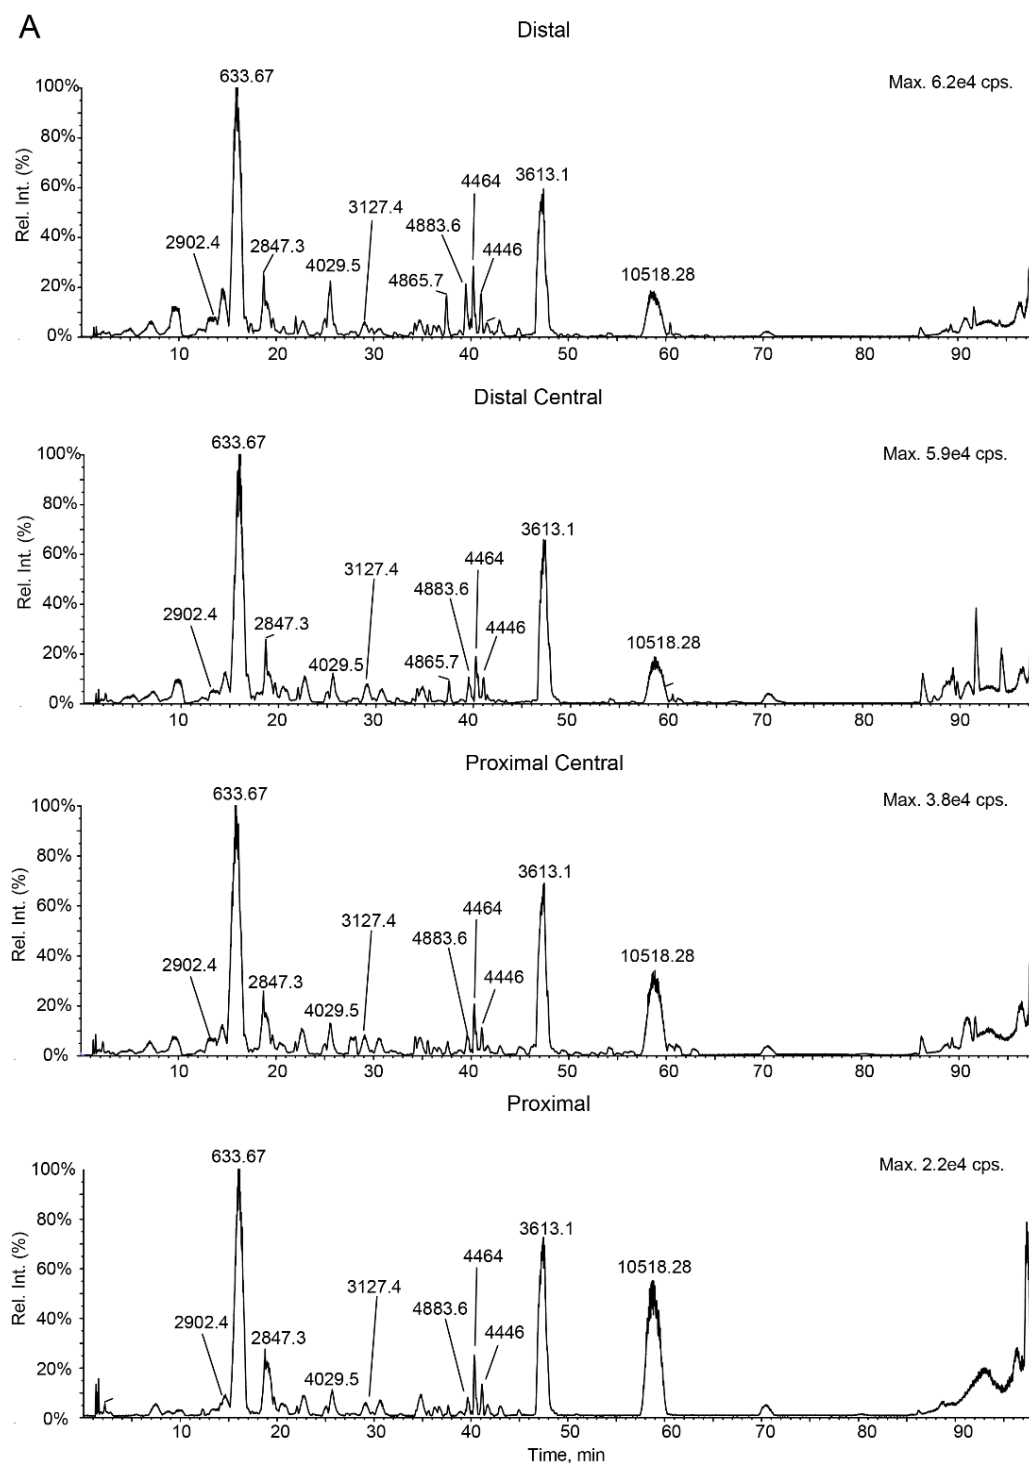

**Figure S1.** LC-ESI-MS analysis of the four duct sections from *C. distans* specimen 2.

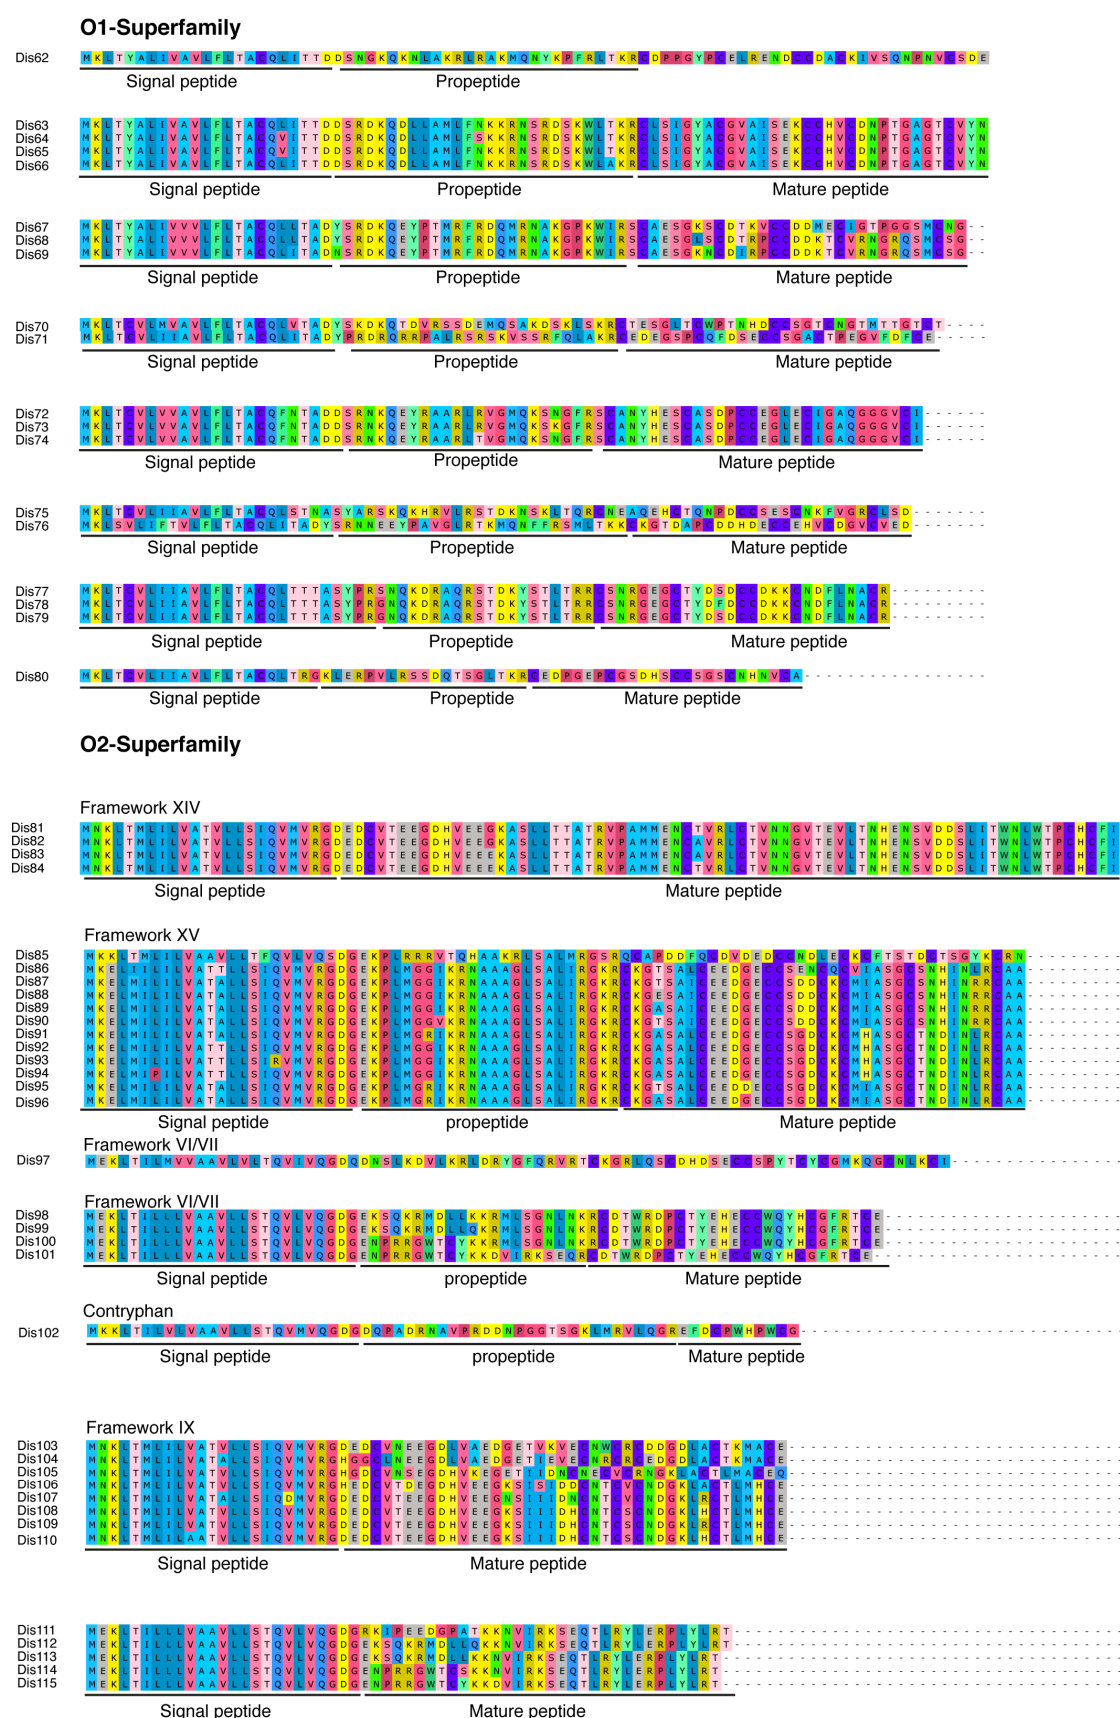Figure S2. O1 and O2 superfamilies in *C. distans*.

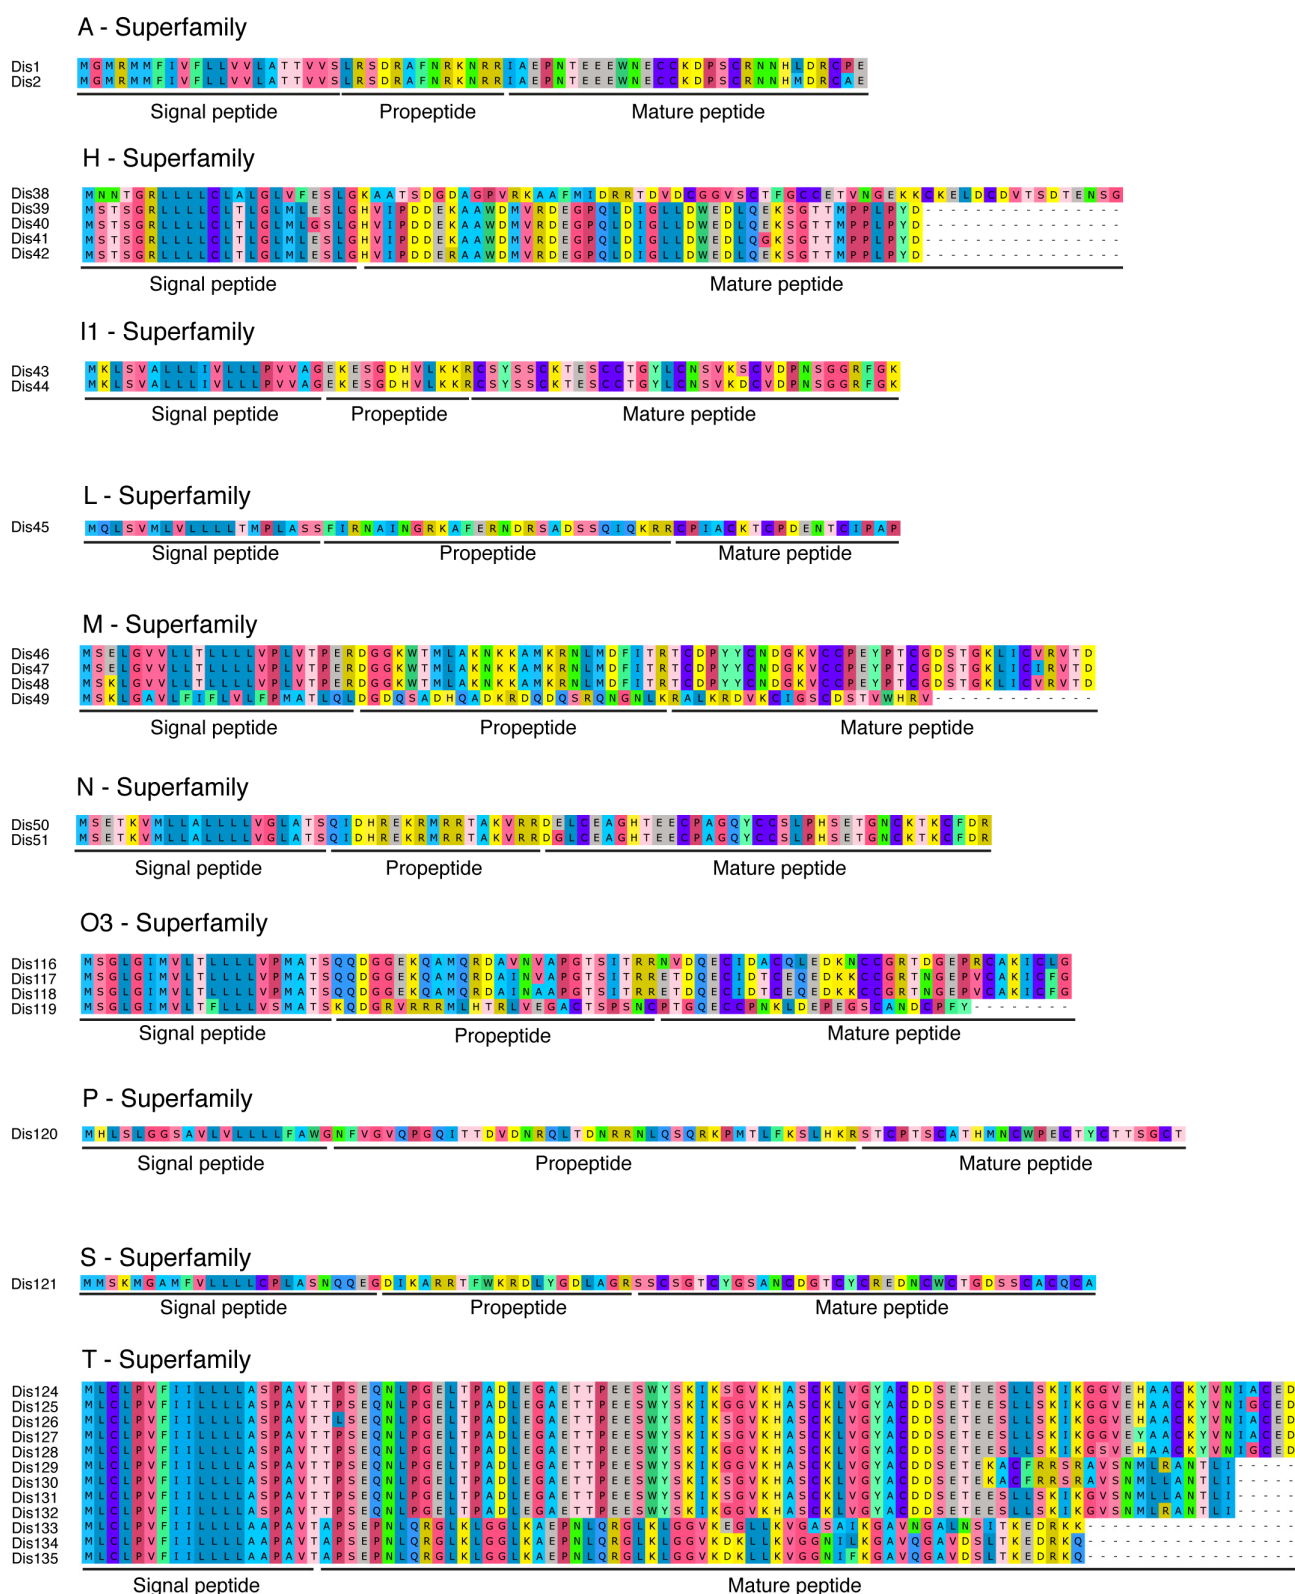Figure S3. Other known superfamilies in *C. distans*.

## A

## Conantokins

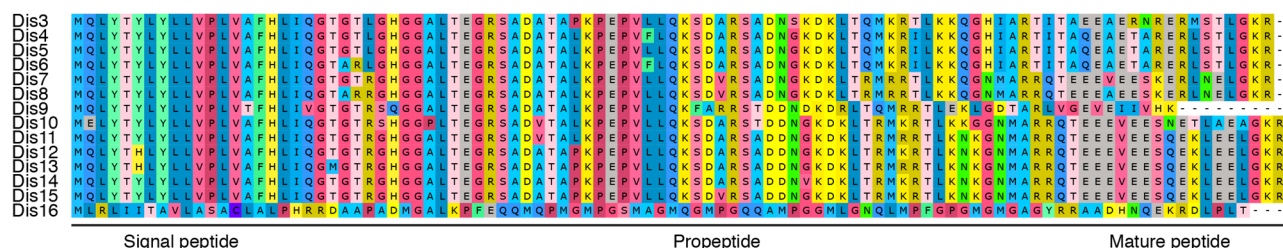

## Conikotikots

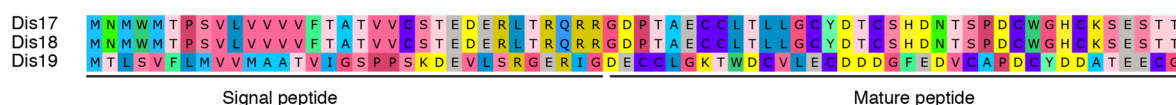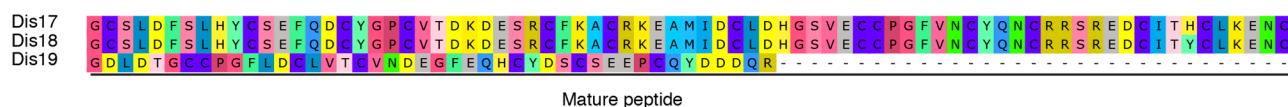

## Conogranulins

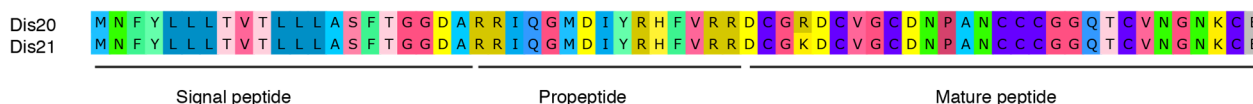

## B

## Divergent M---L-LTVA

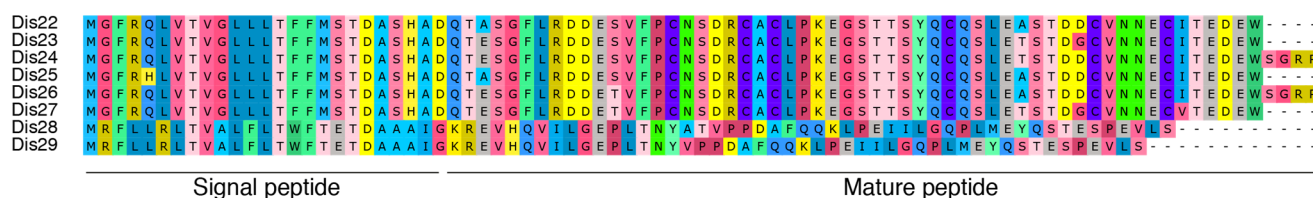

## Divergent MSTLGMTLL

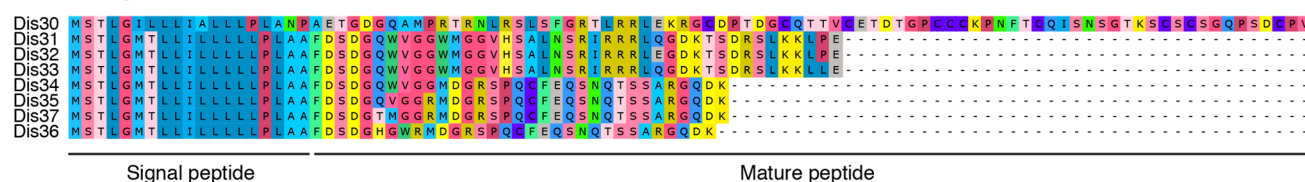Figure S4. Conopeptides (A) and divergent superfamilies (B) in *C. distans*.

## A

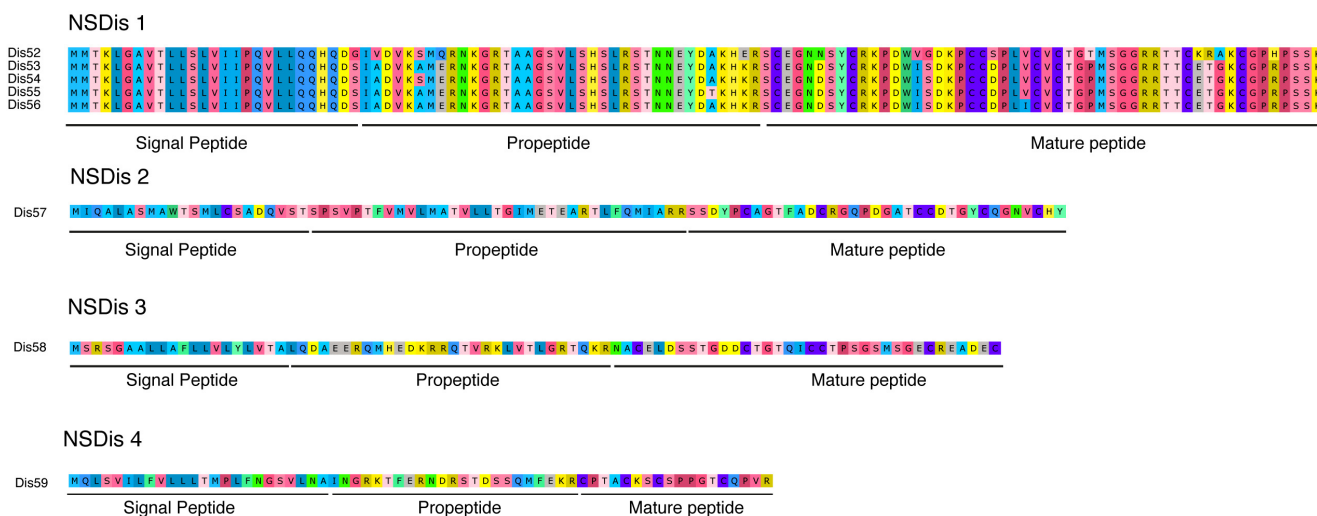

## B

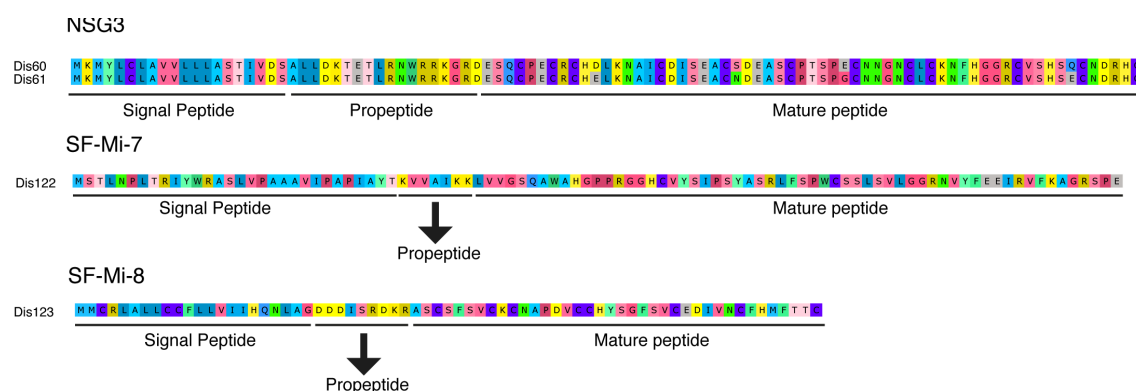

**Figure S5.** Novel superfamilies in *C. distans*. (A) and (B) indicate novel superfamilies reported only in *C. distans* and novel superfamilies also reported in other species.
